# Supplementary material for: Hydroxytyrosol Counteracts Triple Negative Breast Cancer Cell Dissemination via Its Copper Complexing Properties
Source: MDPI journal article supplement (doi:10.3390/biology12111437), 2023-11-16
Supplement: s1 [file s1]

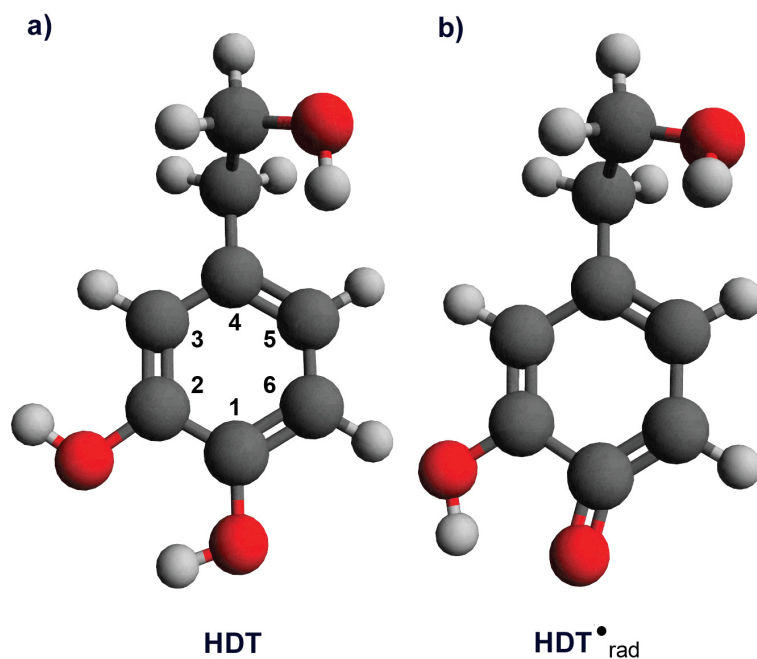

**Supplementary Figure S1.** Molecular geometry of (a) Hydroxytyrosol (HDT) and (b) its phenoxyl radical (HDT<sup>•</sup><sub>rad</sub>) molecules optimized with B3LYP/6-31G (d, p) DFT method. The numbering corresponds to that reported by Davalos et al. (2018) [75].
